# Supplementary material for: Success of Microwave Ablation Treatment for Thyroid Nodules in Older Adults
Source: Research Square preprint supplement (doi:10.21203/rs.3.rs-7325969/v1), 2025-09-30
Supplement: Supplementary file 1 [file 756c3050dc1c328d3e492bb5.pdf]

# Success of Microwave Ablation Treatment of Thyroid Nodules in Older Adults

## Participitans:

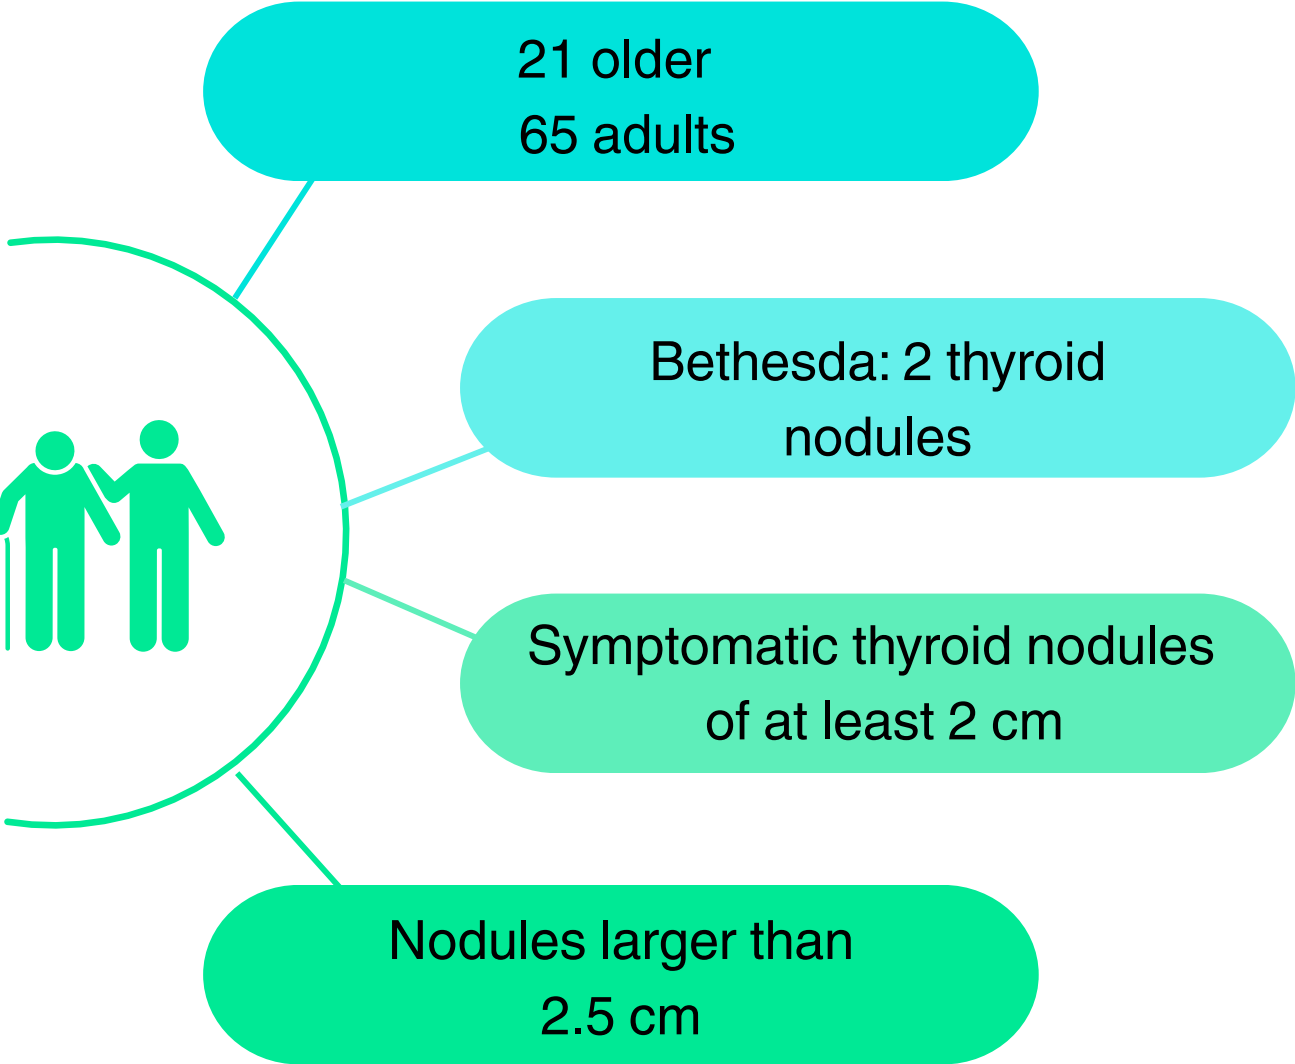

## Primer outcome:

- Efficacy of MWA in treating symptomatic benign thyroid nodules in older adult patients

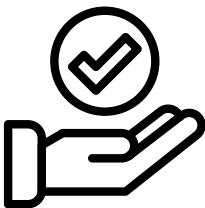

## Evaluation:

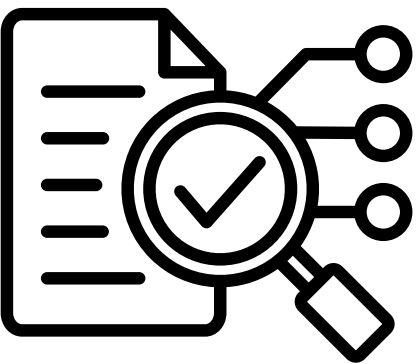

Clinical  
Radiological  
Biochemical

## Results:

- The rate of nodule volume reduction

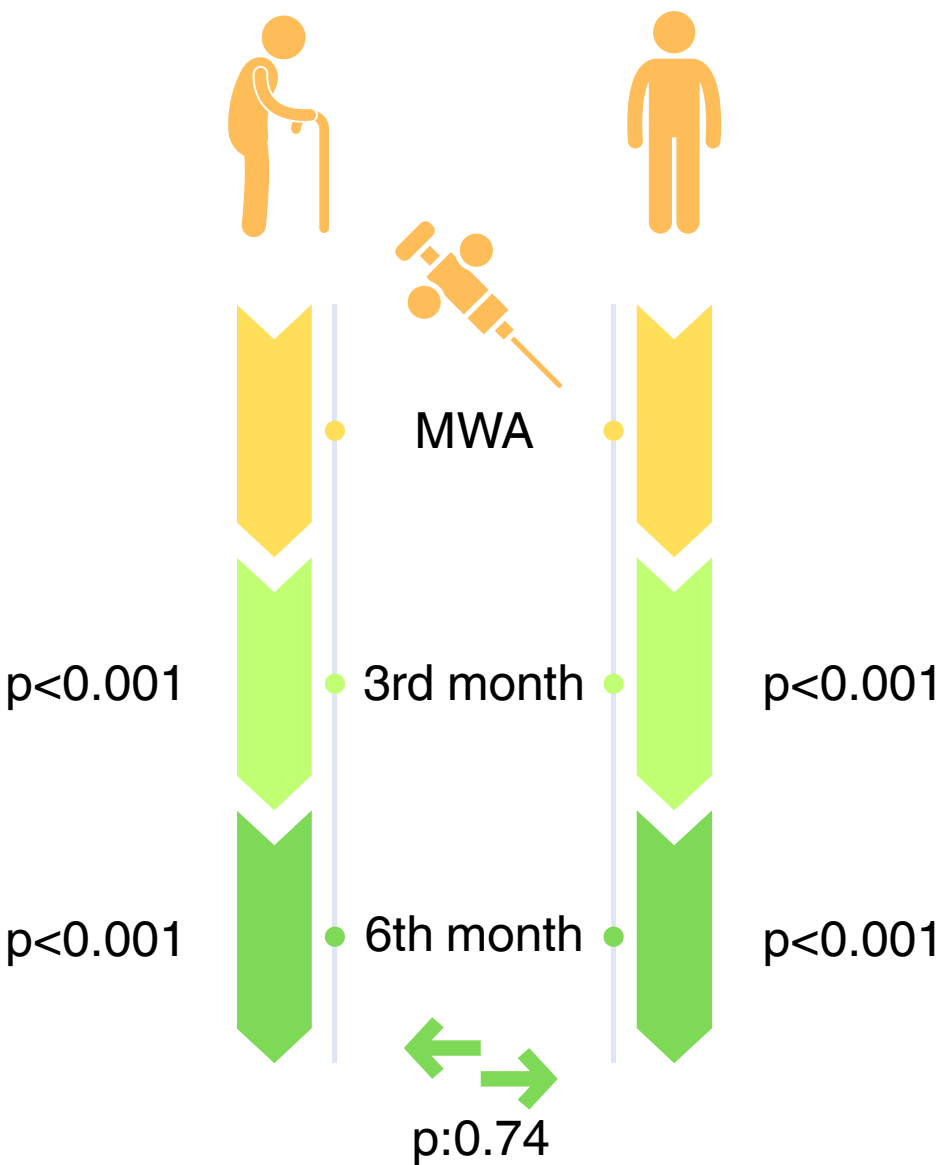

**Conclusion:** “MWA is a safe and effective treatment for benign thyroid nodules in older patients,”
